# Supplementary material for: Template-free, controllable and scalable synthesis of poly(5-aminoindole) nanoparticles for printable electrochemical immunosensor with ultra-high sensitivity
Source: Royal Society of Chemistry journal article supplement (doi:10.1039/d1tb01998h), 2021-11-16
Supplement: d1tb01998h1.pdf [file d1tb01998h1.pdf]

**Template-free, controllable and scalable synthesis of poly(5-aminoindole) nanoparticles for printable electrochemical immunosensor with ultra-high sensitivity**

Taotao Yang <sup>a,1</sup>, Ai Rao <sup>a,1</sup>, Yao Liang <sup>a</sup>, Kun Yang <sup>a</sup>, Yongqin Ye <sup>b</sup>, Xiaoning Ren <sup>a</sup>, Bin Wang <sup>b,\*</sup>,  
Zhiqiang Luo <sup>a,\*</sup>

<sup>a</sup> National Engineering Research Center for Nanomedicine, College of Life Science and Technology, Huazhong University of Science and Technology, Wuhan 430074, China

<sup>b</sup> Department of General Surgery, Shenzhen Children's Hospital, Shenzhen 518026, China.

<sup>1</sup> These authors contributed equally

**Corresponding Author**

\*(Zhiqiang Luo) Email: [zhiqiangluo@hust.edu.cn](mailto:zhiqiangluo@hust.edu.cn) and \*(Bin Wang) Email: [szwb1967@126.com](mailto:szwb1967@126.com)

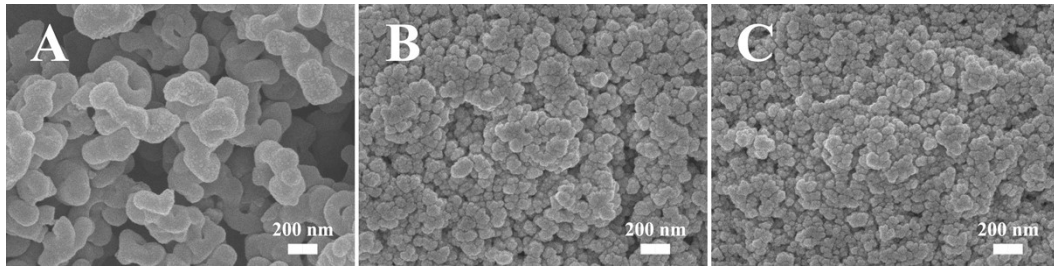

Figure S1. The SEM images of PIn-5-NH<sub>2</sub> nanospheres synthesized using different oxidants. (A) (NH<sub>4</sub>)<sub>2</sub>S<sub>2</sub>O<sub>8</sub>; (B) Fe<sub>2</sub>(SO<sub>4</sub>)<sub>3</sub>; (C) CuCl<sub>2</sub>. Synthesis conditions:  $M_{[\text{oxidant}]} / M_{[\text{In-5-NH}_2]} = 1:1$ ; reaction temperature: 25°C; reaction time: 16 h.

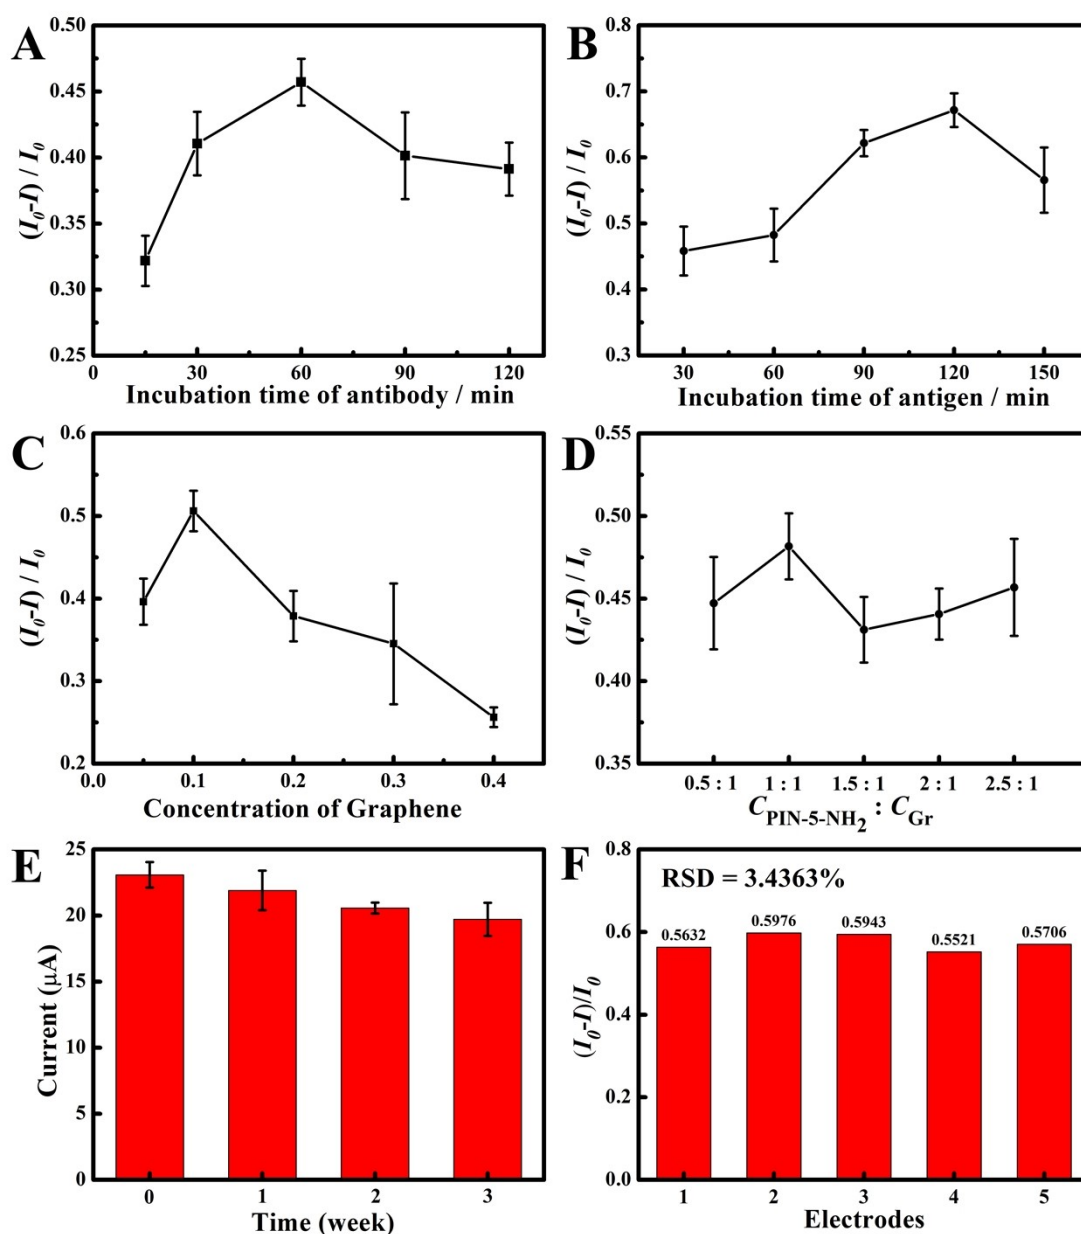

Figure S2. The immunoassay performance of PIn-5-NH<sub>2</sub> based immunosensor. Effects of (A) incubation time of antibody (9.323  $\mu\text{g mL}^{-1}$ ), (B) incubation time of antigen (1  $\text{ng mL}^{-1}$ ), (C) concentration of rGO and (D) the ratio of rGO with PIn-5-NH<sub>2</sub> on the analytical performance of immunosensors. (E) The stability of the electrochemical immunosensors at various storage periods. (F) Current variations of immunosensor towards five different electrodes in the same way.

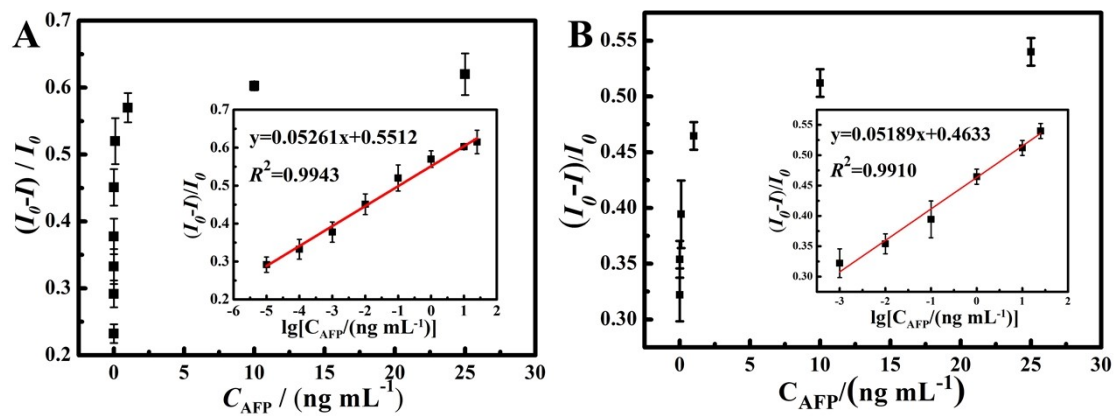

Figure S3. Calibration curve for AFP determination for (A) 327 nm PIn-5-NH<sub>2</sub> NPs; (B) 846 nm PIn-5-NH<sub>2</sub> NPs. (Inset) Linear plot of the inhibition ratio as a function of logarithmic concentration of AFP.

Table S1 The results of AFP detection in human serum samples (n=5)

| Sample | Added (ng mL <sup>-1</sup> ) | Found (ng mL <sup>-1</sup> ) | Recovery (%) | RSD (%) |
|--------|------------------------------|------------------------------|--------------|---------|
| 1      | 0.01                         | 0.0108                       | 108.0        | 6.07    |
| 2      | 0.1                          | 0.11                         | 110.0        | 4.31    |
| 3      | 1.0                          | 0.973                        | 97.30        | 4.08    |
| 4      | 2.0                          | 2.071                        | 103.55       | 5.74    |
| 5      | 5.0                          | 4.91                         | 98.2         | 3.21    |
